# Supplementary material for: Cost evaluation of PAGE-B risk score guided HCC surveillance in patients with treated chronic hepatitis B
Source: Research Square preprint supplement (doi:10.21203/rs.3.rs-103167/v1), 2020-11-06
Supplement: Supplementary file 1 [file 77eac7002d5fedacec5b739a.docx]

**Additional Figure 1:** Work flow at the out-patient clinic

**
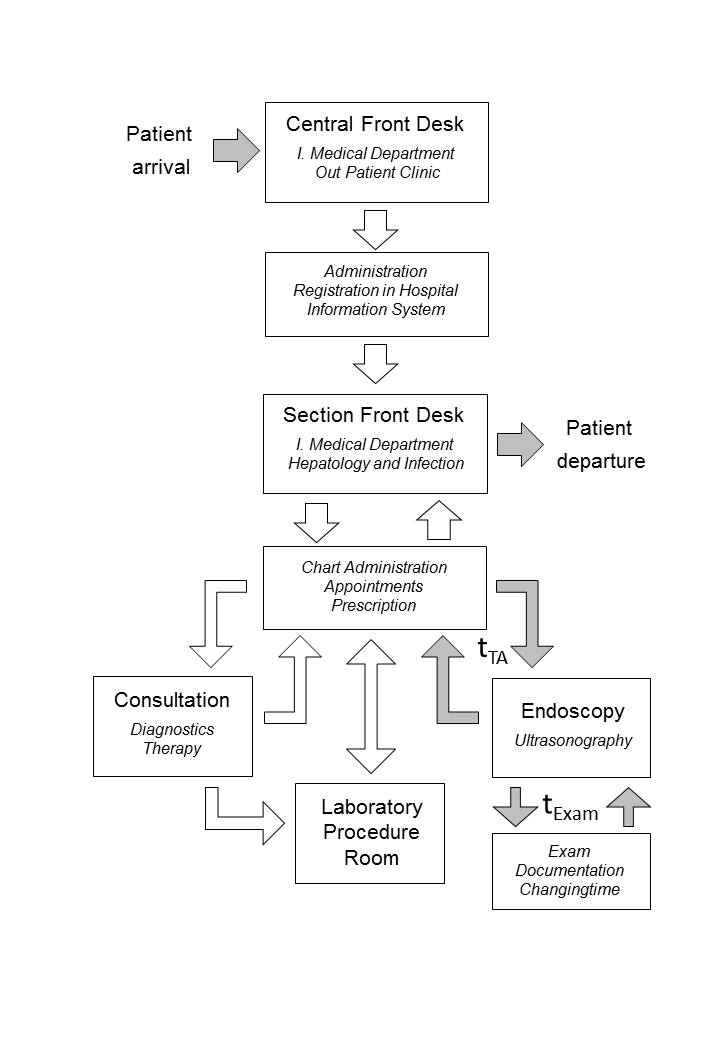
**

**Additional Figure 1:** Work flow at the out-patient clinic. The infrastructure and rooms are given in normal letters, whereas services and procedures are listed in *italic* letters. The patients´ turnaround time spend at the endoscopy ward (tTA) was documented at the front desk of the out-patient clinic. The time during ultrasonography (tExam) was documented by the examiner via a Timeulite® device.

**Additional Table 1:** PAGE-B Score

| **Age** (years) | **Gender** (male/female) | **Platelet count** (n/mm³) |
| --- | --- | --- |
| 16 – 29: 0 pts. | Female: 0 pts. | >200.000: 0 pts. |
| 30 – 39: 2 pts. | Male: 6 pts. | 100.000 - 199.999: 6 pts. |
| 40 – 49: 4 pts. |  | <100.000: 9 pts. |
| 50 – 59: 6 pts. |  |  |
| 60 – 69: 8 pts. |  |  |
| ≥70: 10 pts. |  |  |
| PAGE-B Score according to G. Papatheodoridis *et al.* [1] to assess HCC risk in Caucasian cHB patients under treatment with NAs (entecavir or tenofovir). Patients are categorized into a low (≤9 pts.), medium (10–17 pts.) and high (≥18 pts.) HCC risk group. The score ranges from 0- 25 points (pts.) | | |

Additional Table 2: Patients with chronic hepatitis B and antiviral therapy indication (Germany)

| **Dependent population strata** | **Factor** | **Patient (N)** | **Reference** |
| --- | --- | --- | --- |
| Total population (Germany) | baseline | 80,209,997 | [2] |
| HBsAg positive | 0.3%-0.7% | 240,629-561,469 | [3-6] |
| HBV viral load (>2000 IU/ml) | 14.7% | 35,372-82,536 | [4] |
| Elevated ALT (>ULN) | 43.8-59.4% | 15,493-49,026 | [4, 5] |
| PAGE-B score ≤9 points | 24.7%-44.1% | 3,827-21,620 | [1, 7] |
| *The total German population was derived from the population census (2011) and modeled for the year 2018. The total population included persons >15 years of age. IU, international units; ULN, upper limit of normal.* | | | |

# References

1. Papatheodoridis G, Dalekos G, Sypsa V, Yurdaydin C, Buti M, Goulis J, Calleja JL, Chi H, Manolakopoulos S, Mangia G *et al*: **PAGE-B predicts the risk of developing hepatocellular carcinoma in Caucasians with chronic hepatitis B on 5-year antiviral therapy**. *Journal of hepatology* 2016, **64**(4):800-806.

2. Bundesamt S: **Bevölkerung (Zensus), nach Bundesländer, Stichtag, Nationalität, Altersgruppen**. 2018.

3. **HBV nach Jahr und Falldefinition 2001 bis 2018** [<https://survstat.rki.de/Content/Query/Create.aspx>]

4. Wolffram I, Petroff D, Batz O, Jedrysiak K, Kramer J, Tenckhoff H, Berg T, Wiegand J, German Check-Up 35+ Study G: **Prevalence of elevated ALT values, HBsAg, and anti-HCV in the primary care setting and evaluation of guideline defined hepatitis risk scenarios**. *Journal of hepatology* 2015, **62**(6):1256-1264.

5. Fischer C, Mauss S, Zehnter E, Bokemeyer B, Heyne R, Huppe D: **[Epidemiology and clinical characteristics of patients with chronic hepatitis B (CHB) in Germany - results of a nationwide cross-sectional study]**. *Z Gastroenterol* 2012, **50**(1):22-29.

6. Huetter ML, Fuchs M, Hanle MM, Mason RA, Akinli AS, Imhof A, Kratzer W, Lorenz R, group Es: **Prevalence of risk factors for liver disease in a random population sample in southern Germany**. *Z Gastroenterol* 2014, **52**(6):558-563.

7. Riveiro-Barciela M, Tabernero D, Calleja JL, Lens S, Manzano ML, Rodriguez FG, Crespo J, Piqueras B, Pascasio JM, Comas C *et al*: **Effectiveness and Safety of Entecavir or Tenofovir in a Spanish Cohort of Chronic Hepatitis B Patients: Validation of the Page-B Score to Predict Hepatocellular Carcinoma**. *Dig Dis Sci* 2017, **62**(3):784-793.
